# Supplementary material for: Characterization of the global metabolic profile of liquiritin in rat plasma, urine, bile and feces based on UHPLC-FT-ICR MS
Source: Royal Society of Chemistry journal article supplement (doi:10.1039/c7ra12529a), 2018-01-01
Supplement: c7ra12529a1.pdf [file c7ra12529a1.pdf]

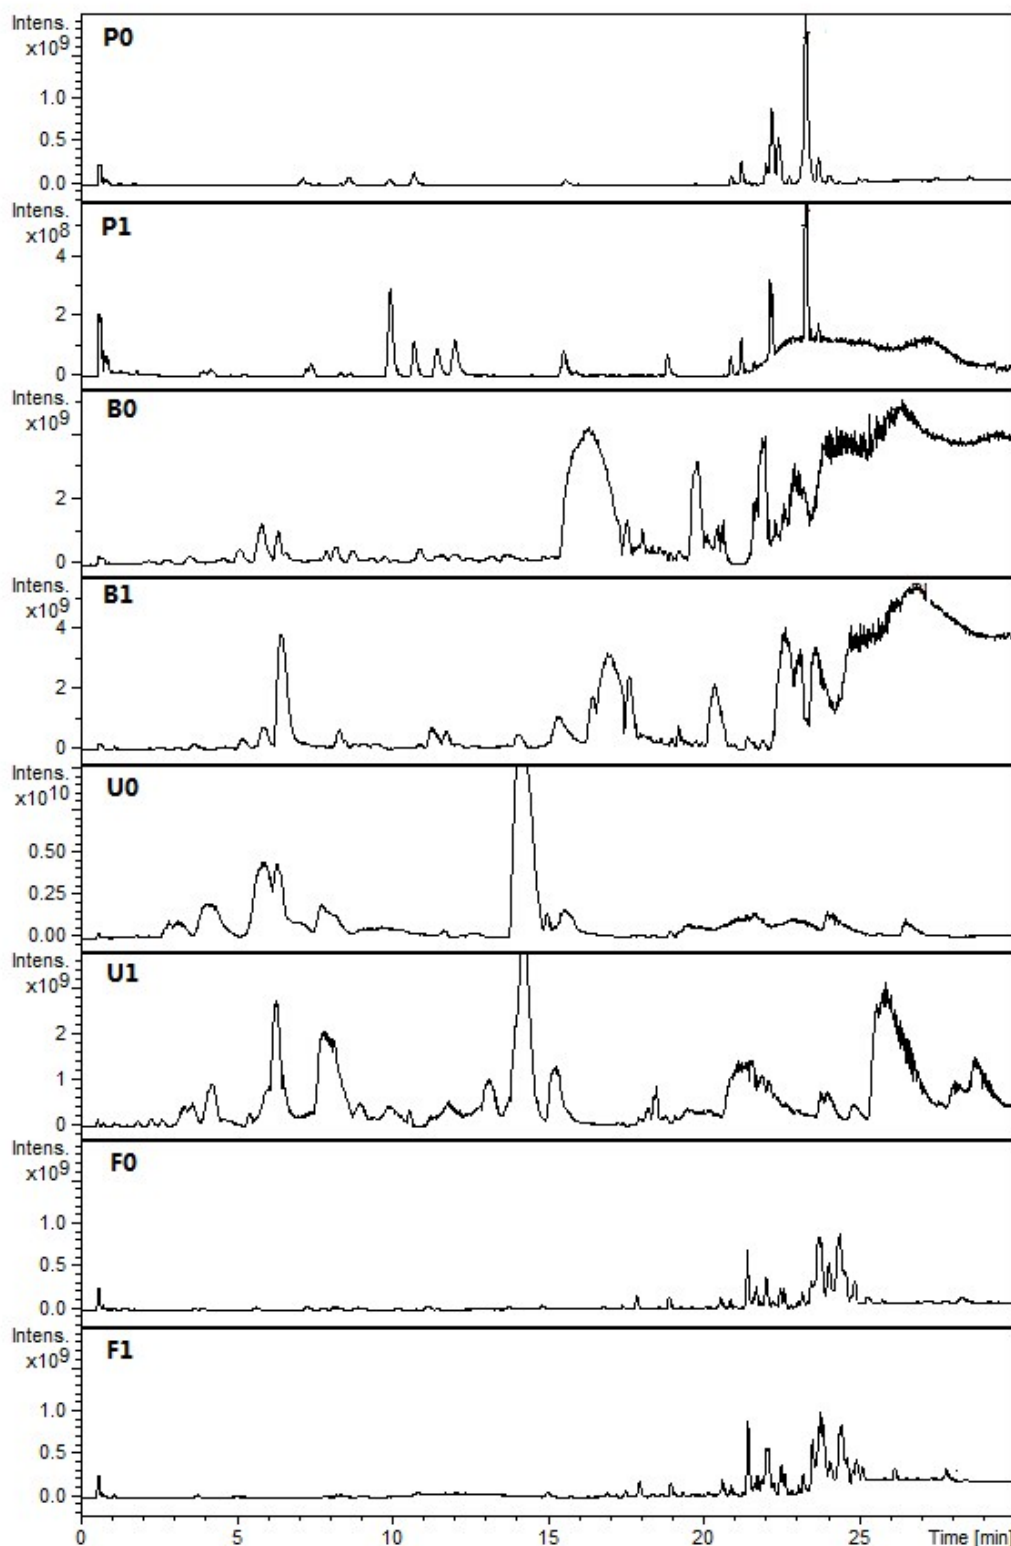

**Supplementary Fig.1.** Base peak intensity chromatograms (BPCs) of biological samples in negative ion mode. P0, B0, U0 and F0 represent blank samples of plasma, bile, urine and feces from rats; P1, B1, U1 and F1 represent plasma, bile, urine and feces samples from rats after oral administration of liquiritin.

A

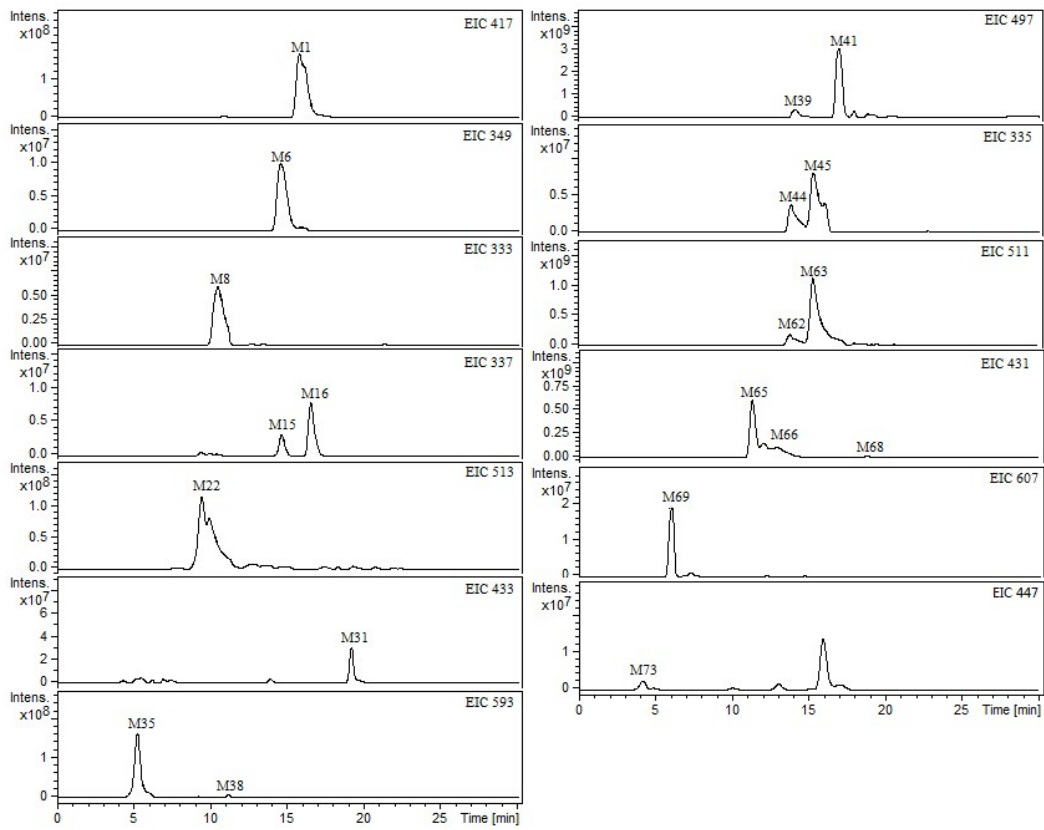

**B**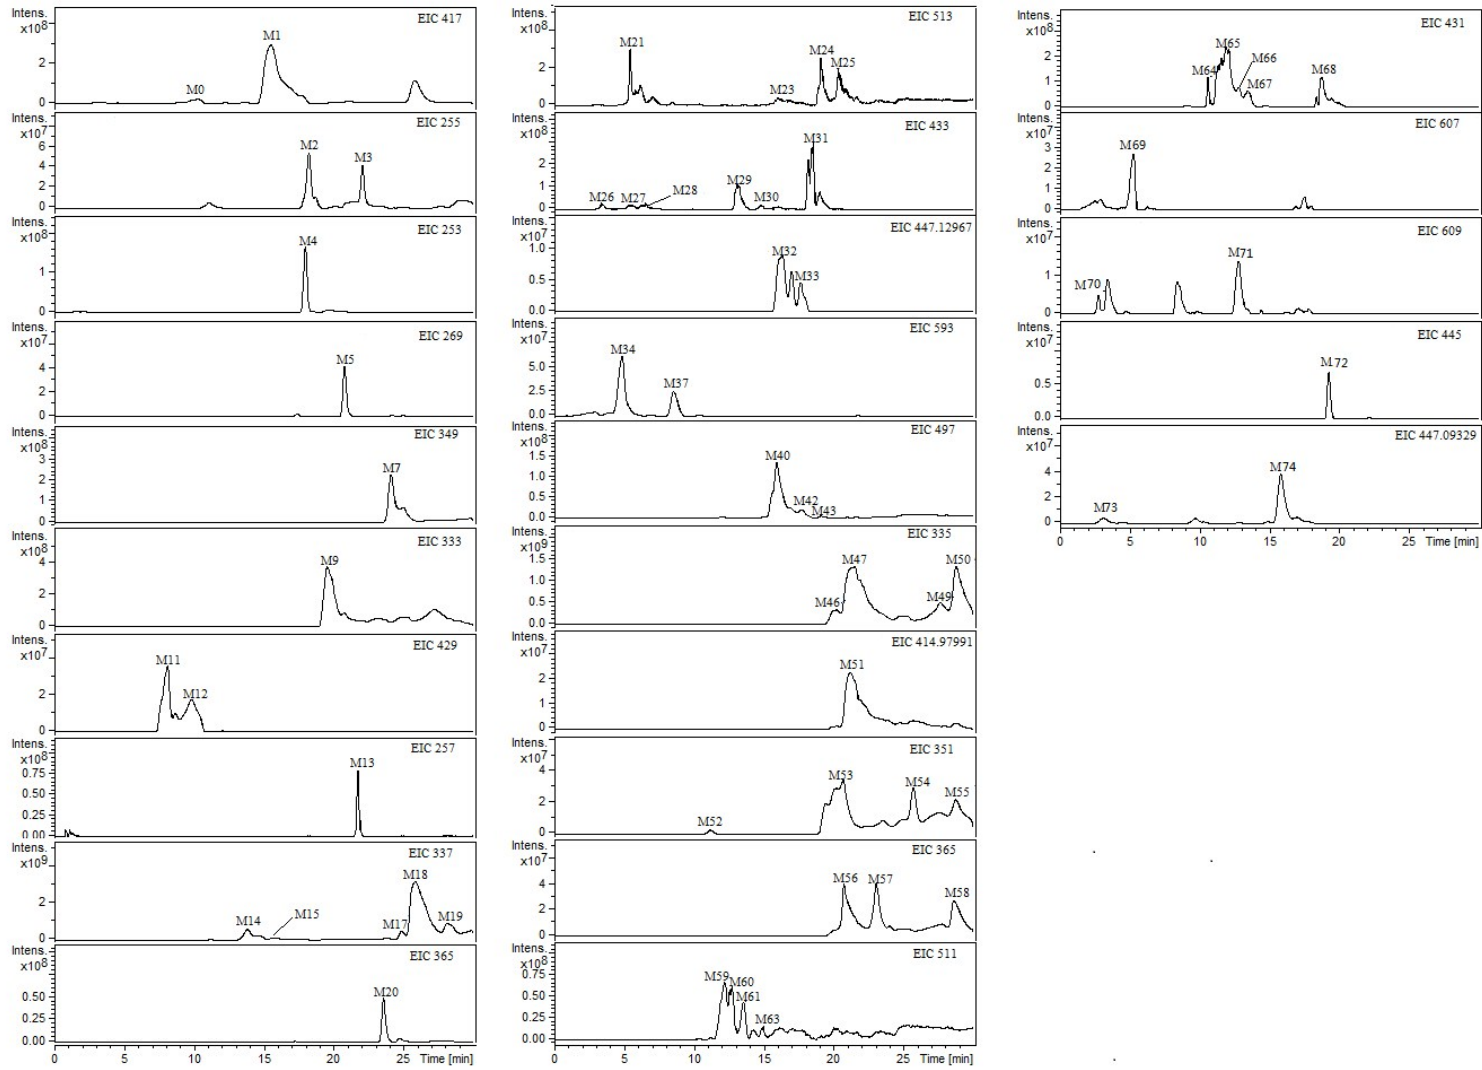

C

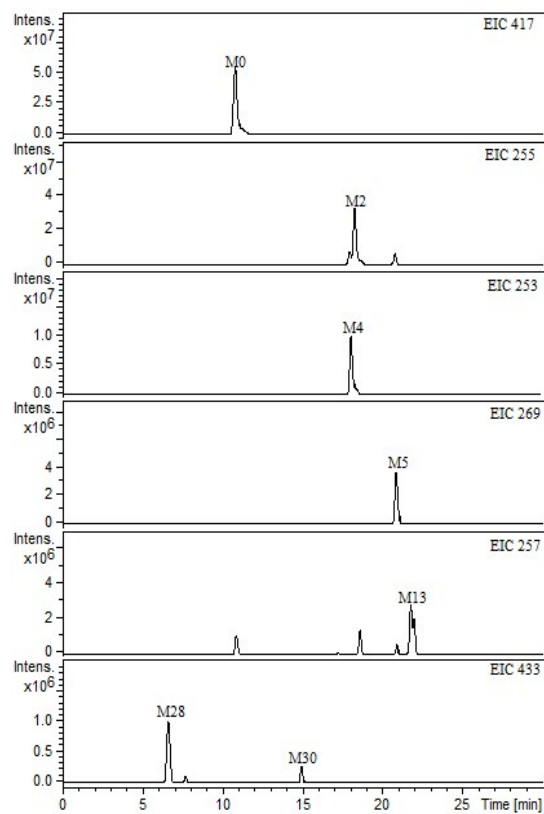

**Supplementary Fig 2. Extracted ion chromatograms (EICs) for metabolites of liquiritin in rats: (A) bile; (B) urine; (C) feces. M0 represents parent drug; M1–M76 represent metabolites of liquiritin.**

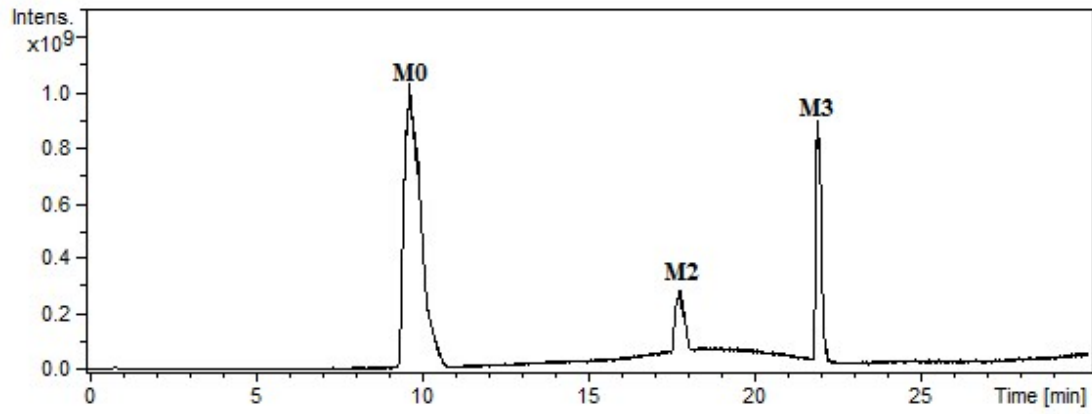

**Supplementary Fig 3 BPC chromatograms of standard substances of liquiritin, liquiritigenin and isoliquiritigenin.**

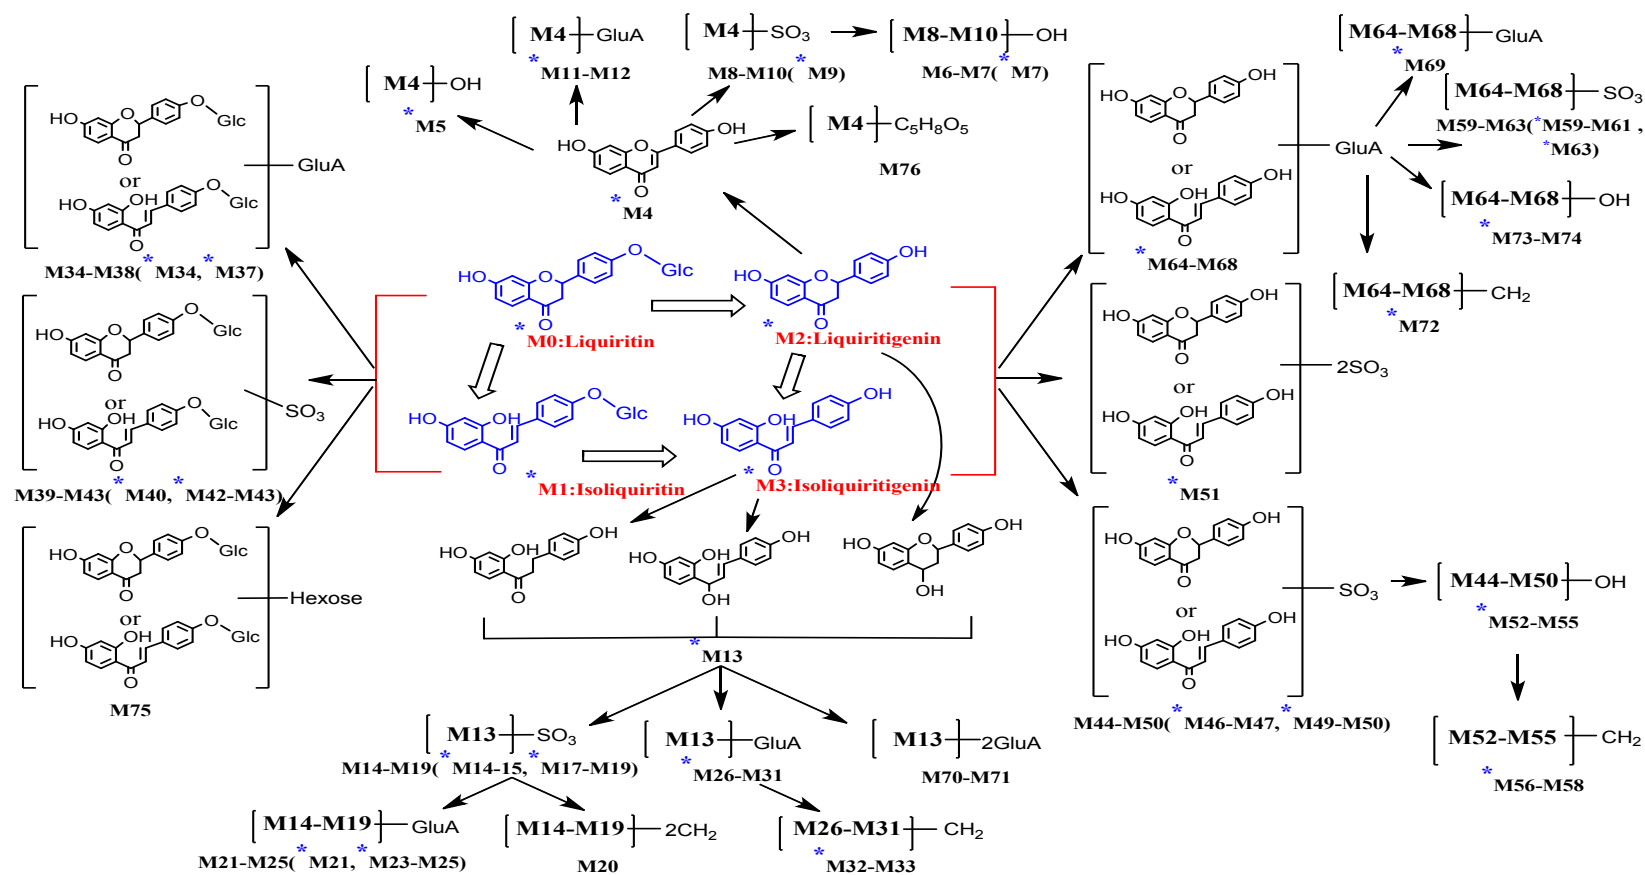

Supplementary Fig.4 Proposed metabolic pathways of liquiritin in rats. M1, M2 and M3 were the major metabolites of liquiritin.

The kidney is the major elimination pathway after oral administration of liquiritin, and the metabolites detected in rat urine were marked with \*.

**Supplementary Table** Potential new metabolites of liquiritin detected and tentatively identified by UHPLC-FT-ICR MS method in rats

| No. | t <sub>R</sub><br>(min) | [M-H] <sup>-</sup>      |                       |                | MS/MS                          | Formula                                                        | Metabolite description                                                        | Matrix |
|-----|-------------------------|-------------------------|-----------------------|----------------|--------------------------------|----------------------------------------------------------------|-------------------------------------------------------------------------------|--------|
|     |                         | Calculated<br>Mass (Da) | Observed<br>Mass (Da) | Error<br>(ppm) |                                |                                                                |                                                                               |        |
| M4  | 17.94                   | 253.05063               | 253.05029             | 1.34           | 224.04719, 135.00929           | C <sub>15</sub> H <sub>10</sub> O <sub>4</sub>                 | Deglycosylation+dehydrogenation                                               | U, F   |
| M5  | 20.77                   | 269.04555               | 269.04530             | 0.91           | 224.04718, 253.05063           | C <sub>15</sub> H <sub>10</sub> O <sub>5</sub>                 | Deglycosylation+dehydrogenation+hydroxylation                                 | U, F   |
| M6  | 14.70                   | 349.00236               | 349.00198             | 1.10           | 269.04502                      | C <sub>15</sub> H <sub>10</sub> O <sub>8</sub> S               | Deglycosylation+ isomerization+sulfation+<br>hydroxylation+ dehydrogenation   | B      |
| M7  | 24.07                   | 349.00236               | 349.00210             | 0.75           | 269.04498                      | C <sub>15</sub> H <sub>10</sub> O <sub>8</sub> S               | Deglycosylation+ isomerization+sulfation+<br>hydroxylation+ dehydrogenation   | U      |
| M8  | 10.27                   | 333.00745               | 333.00707             | 1.13           | 253.05063                      | C <sub>15</sub> H <sub>10</sub> O <sub>7</sub> S               | Deglycosylation+dehydrogenation+sulfation                                     | B      |
| M9  | 19.55                   | 333.00745               | 333.00717             | 0.84           | 253.05045                      | C <sub>15</sub> H <sub>10</sub> O <sub>7</sub> S               | Deglycosylation+dehydrogenation+sulfation                                     | U      |
| M10 | 21.50                   | 333.00745               | 333.00740             | 0.15           | 253.05063                      | C <sub>15</sub> H <sub>10</sub> O <sub>7</sub> S               | Deglycosylation+dehydrogenation+sulfation                                     | P      |
| M11 | 8.13                    | 429.08272               | 429.08270             | 0.05           | 253.05069                      | C <sub>21</sub> H <sub>18</sub> O <sub>10</sub>                | Deglycosylation+dehydrogenation+glucuronidation                               | U, P   |
| M12 | 9.91                    | 429.08272               | 429.08270             | 0.05           | 253.05056                      | C <sub>21</sub> H <sub>18</sub> O <sub>10</sub>                | Deglycosylation+dehydrogenation+glucuronidation                               | U      |
| M20 | 23.56                   | 365.07005               | 365.06969             | 0.97           | –                              | C <sub>17</sub> H <sub>18</sub> O <sub>7</sub> S               | Deglycosylation+ isomerization+sulfation+<br>hydrogenation+ methylation       | U      |
| M32 | 16.33                   | 447.12967               | 447.12953             | 0.31           | 271.06026                      | C <sub>22</sub> H <sub>24</sub> O <sub>10</sub>                | Deglycosylation+ isomerization+glucuronidation+<br>methylation+ hydrogenation | U      |
| M33 | 17.63                   | 447.12967               | 447.12952             | 0.33           | 271.06027                      | C <sub>22</sub> H <sub>24</sub> O <sub>10</sub>                | Deglycosylation+ isomerization+glucuronidation+<br>methylation+ hydrogenation | U      |
| M51 | 21.11                   | 414.97991               | 414.97975             | 0.39           | 255.06593                      | C <sub>15</sub> H <sub>12</sub> O <sub>10</sub> S <sub>2</sub> | Deglycosylation+ isomerization+sulfation                                      | U      |
| M52 | 11.18                   | 351.01801               | 351.01794             | 0.21           | 271.06028, 255.06542 135.53017 | C <sub>15</sub> H <sub>12</sub> O <sub>8</sub> S               | Deglycosylation+ isomerization+sulfation+<br>hydroxylation                    | U      |
| M53 | 20.02                   | 351.01801               | 351.01784             | 0.49           | 271.06023, 255.06541 135.53011 | C <sub>15</sub> H <sub>12</sub> O <sub>8</sub> S               | Deglycosylation+ isomerization+sulfation+<br>hydroxylation                    | U      |

|     |       |           |           |       |                      |           |                                                  |                                                                      |      |
|-----|-------|-----------|-----------|-------|----------------------|-----------|--------------------------------------------------|----------------------------------------------------------------------|------|
| M54 | 25.68 | 351.01801 | 351.01798 | 0.09  | 271.06040, 255.06549 | 135.53018 | C <sub>15</sub> H <sub>12</sub> O <sub>8</sub> S | Deglycosylation+ isomerization+sulfation+ hydroxylation              | U    |
| M55 | 28.82 | 351.01801 | 351.01769 | 0.90  | 271.06020, 255.06540 | 135.53014 | C <sub>15</sub> H <sub>12</sub> O <sub>8</sub> S | Deglycosylation+ isomerization+sulfation+ hydroxylation              | U    |
| M56 | 20.71 | 365.03366 | 365.03344 | 0.61  | 285.07632            |           | C <sub>16</sub> H <sub>14</sub> O <sub>8</sub> S | Deglycosylation+ isomerization+sulfation+ hydroxylation+ methylation | U    |
| M57 | 23.04 | 365.03366 | 365.03339 | 0.75  | 285.07637            |           | C <sub>16</sub> H <sub>14</sub> O <sub>8</sub> S | Deglycosylation+ isomerization+sulfation+ hydroxylation+ methylation | U    |
| M58 | 28.57 | 365.03366 | 365.03310 | 1.54  | 285.07645            |           | C <sub>16</sub> H <sub>14</sub> O <sub>8</sub> S | Deglycosylation+ isomerization+sulfation+ hydroxylation+ methylation | U    |
| M70 | 2.79  | 609.14611 | 609.14646 | -0.57 | –                    |           | C <sub>27</sub> H <sub>30</sub> O <sub>16</sub>  | Deglycosylation+ isomerization+glucuronidation+ hydrogenation        | U    |
| M71 | 12.82 | 609.14611 | 609.14551 | 0.99  | –                    |           | C <sub>27</sub> H <sub>30</sub> O <sub>16</sub>  | Deglycosylation+ isomerization+glucuronidation+ hydrogenation        | U    |
| M72 | 19.24 | 445.11402 | 445.11379 | 0.52  | 269.04459            |           | C <sub>22</sub> H <sub>22</sub> O <sub>10</sub>  | Deglycosylation+ isomerization+glucuronidation+ methylation          | U    |
| M73 | 3.29  | 447.09329 | 447.09309 | 0.43  | 271.06024, 255.06553 | 135.53028 | C <sub>21</sub> H <sub>20</sub> O <sub>11</sub>  | Deglycosylation+ isomerization+glucuronidation+ hydroxylation        | U, B |
| M74 | 15.82 | 447.09329 | 447.09300 | 0.64  | 271.06027, 255.06552 | 135.53045 | C <sub>21</sub> H <sub>20</sub> O <sub>11</sub>  | Deglycosylation+ isomerization+glucuronidation+ hydroxylation        | U, P |
| M75 | 14.76 | 579.17193 | 579.17295 | -1.76 | –                    |           | C <sub>27</sub> H <sub>32</sub> O <sub>14</sub>  | hexose                                                               | P    |
| M76 | 21.94 | 401.08784 | 401.08772 | 0.22  | –                    |           | C <sub>20</sub> H <sub>18</sub> O <sub>9</sub>   | Deglycosylation+dehydrogenation+pentaose                             | P    |

P, U, B and F represent rat plasma, urine, bile and feces samples, respectively.

“–” represent that MS/MS data of this metabolite was not detected.
